# Supplementary material
Source: PubMed Central journal article supplement (PMC6904814)
Supplement: mmc1.pdf [file mmc1.pdf]

**The American Journal of Human Genetics, Volume 105**

**Supplemental Data**

**A Fast and Accurate Method for Genome-wide Scale**

**Phenome-wide  $G \times E$  Analysis and Its**

**Application to UK Biobank**

**Wenjian Bi, Zhangchen Zhao, Rounak Dey, Lars G. Fritsche, Bhramar Mukherjee, and Seunggeun Lee**

## Supplementary Methods

Section A: R codes to evaluate computation time of Wald test under different case-control ratios

```
library(rbenchmark)
set.seed(1)
N = 400000
MAF = 0.3
Data1 = data.frame(y1=rbinom(N,1,0.5),
  y2=rbinom(N,1,0.01),
  X=matrix(rnorm(N*5),N,5),
  g=rbinom(N,2,MAF))
benchmark(res1<-glm(y1~X.1+X.2+X.3+X.4+X.5*g,data=Data1,family = binomial),
  res2<-glm(y2~X.1+X.2+X.3+X.4+X.5*g,data=Data1,family = binomial),
  replications = 3)
res1$iter
res2$iter
```

Section B: More details about the five environmental factors in UK Biobank data analyses

Given field ID, the environmental factors can be found via UK Biobank website. The below is a brief description:

1. smoking status (<http://biobank.ndph.ox.ac.uk/showcase/field.cgi?id=20116>): Encoded using 0-2: 0 for never smoker; 1 for previous smoker; and 2 for current smoker.
2. vigorous physical activity (<http://biobank.ndph.ox.ac.uk/showcase/field.cgi?id=904>): Number of days/week of vigorous physical activity 10+ minutes: ranging from 0 to 7.
3. moderate physical activity (<http://biobank.ndph.ox.ac.uk/showcase/field.cgi?id=804>): Number of days/week of moderate physical activity 10+ minutes: ranging from 0 to 7.
4. gender (<http://biobank.ndph.ox.ac.uk/showcase/field.cgi?id=31>): 0 for female and 1 for male.
5. alcohol intake frequency (<http://biobank.ndph.ox.ac.uk/showcase/field.cgi?id=1558>): 1 for Daily or almost daily; 2 for Three or four times a week; 3 for Once or twice a week; 4 for One to three times a month; 5 for Special occasions only; 6 for Never

**Figure S1. Empirical type I error rates based on  $10^6$  simulated variants with  $\beta_G \neq 0$**

The variants were simulated following MAF distribution of UK Biobank. SPAGE and SPAGE-NoSPA are the proposed methods with a saddlepoint approximation and a normal approximation, respectively. RAW SPAGE and RAW SPAGE-NoSPA do not use the hybrid strategy but use the approximate statistic  $S$  to test all variants.

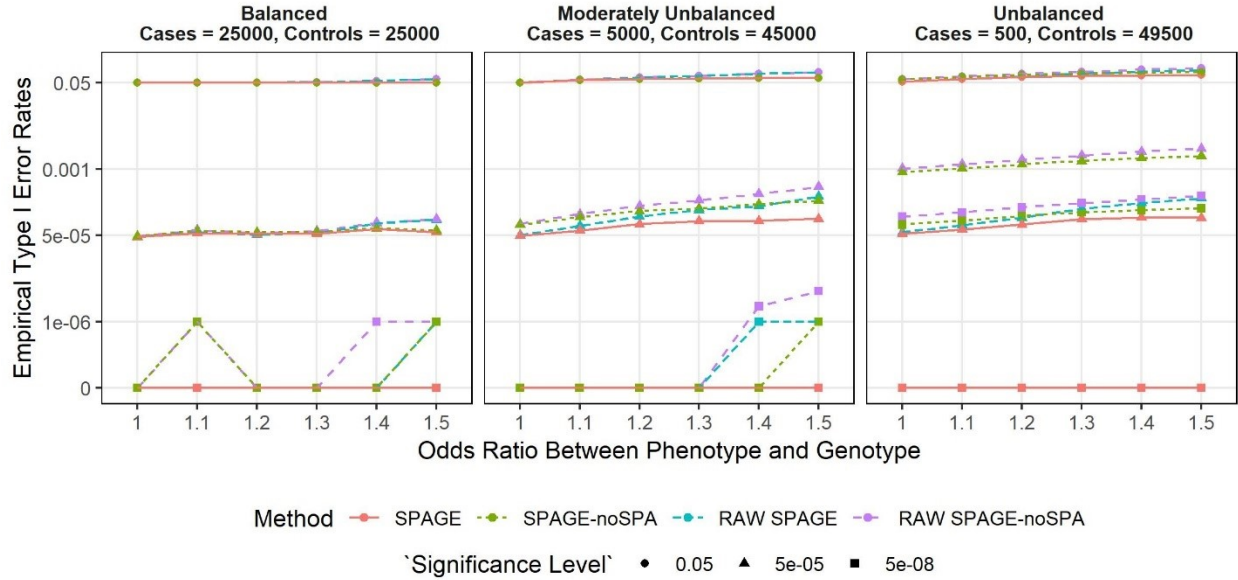

**Figure S2. Power comparison of SPAGE, Wald and Firth's test when MAF=0.001**

Empirical powers were estimated based on  $10^5$  simulated variants with a wide range of  $\beta_{G \times E} \neq 0$  when MAF was fixed at 0.001. From top to bottom, the plots show empirical powers when the sample size  $N=50,000$ ,  $100,000$  and  $200,000$ , respectively. From left to right, the plots consider case-control ratios of 1:1 (balanced), 1:9 (moderately unbalanced), and 1:99 (unbalanced). Round points are for powers at  $\alpha = 5 \times 10^{-5}$  and triangle points are for powers at  $\alpha = 5 \times 10^{-8}$ .

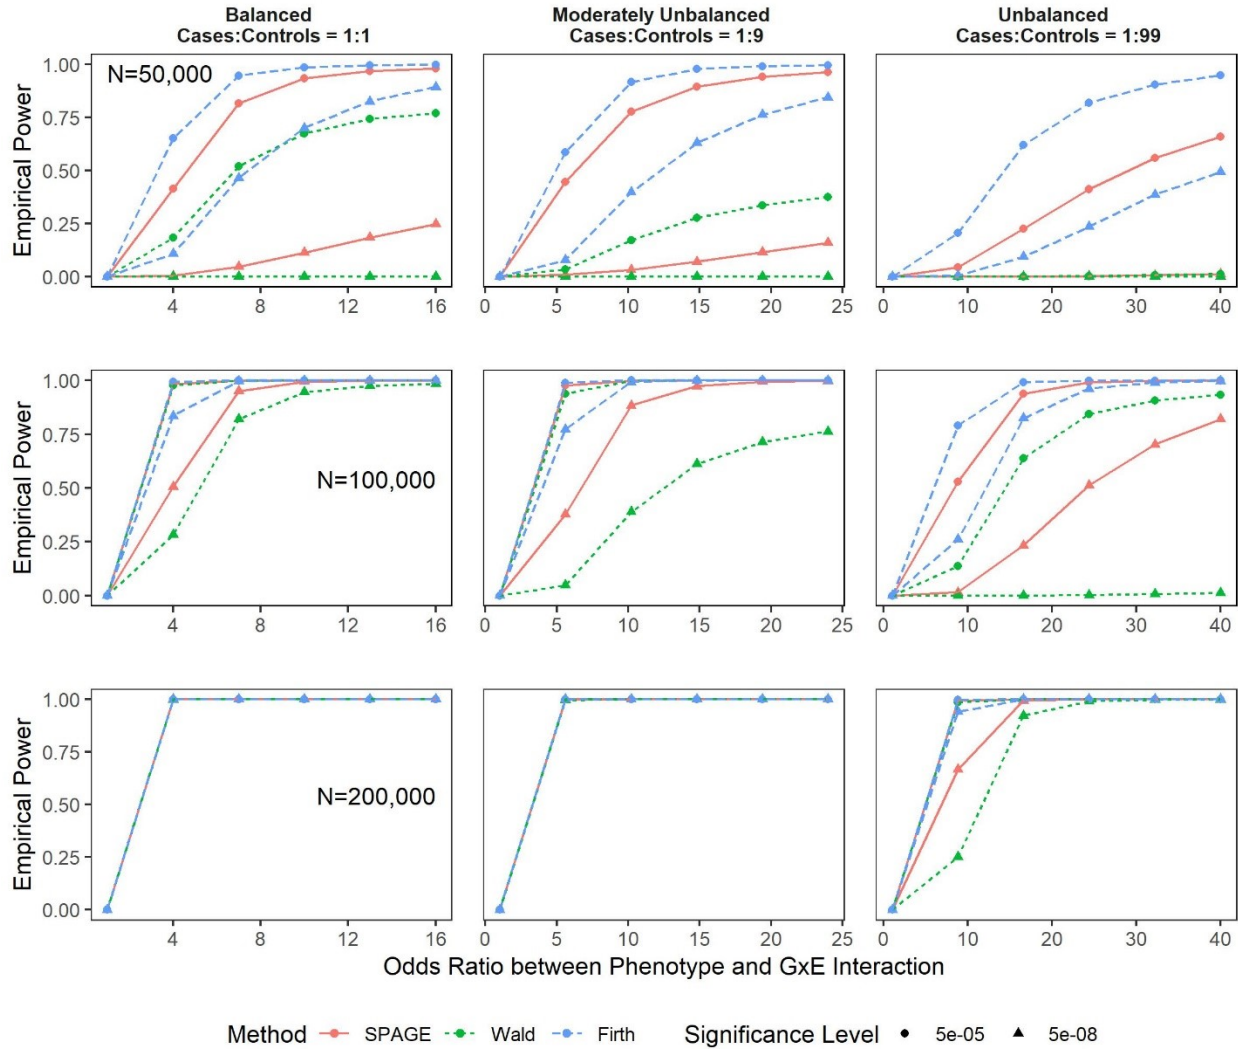

**Figure S3. Power comparison of SPAGE, CML and EB when MAF=0.001**

Empirical powers were estimated based on  $10^5$  simulated variants with a wide range of  $\beta_{G \times E} \neq 0$  when MAF was fixed at 0.001. From top to bottom, the plots show empirical powers when the sample size  $N=50,000$ ,  $100,000$  and  $200,000$ , respectively. From left to right, the plots consider case-control ratios of 1:1 (balanced), 1:9 (moderately unbalanced), and 1:99 (unbalanced). CML (constrained maximum likelihood) and EB (empirical Bayes) were calculated via an R package CGEN. Round points are for powers at  $\alpha = 5 \times 10^{-5}$  and triangle points are for powers at  $\alpha = 5 \times 10^{-8}$ .

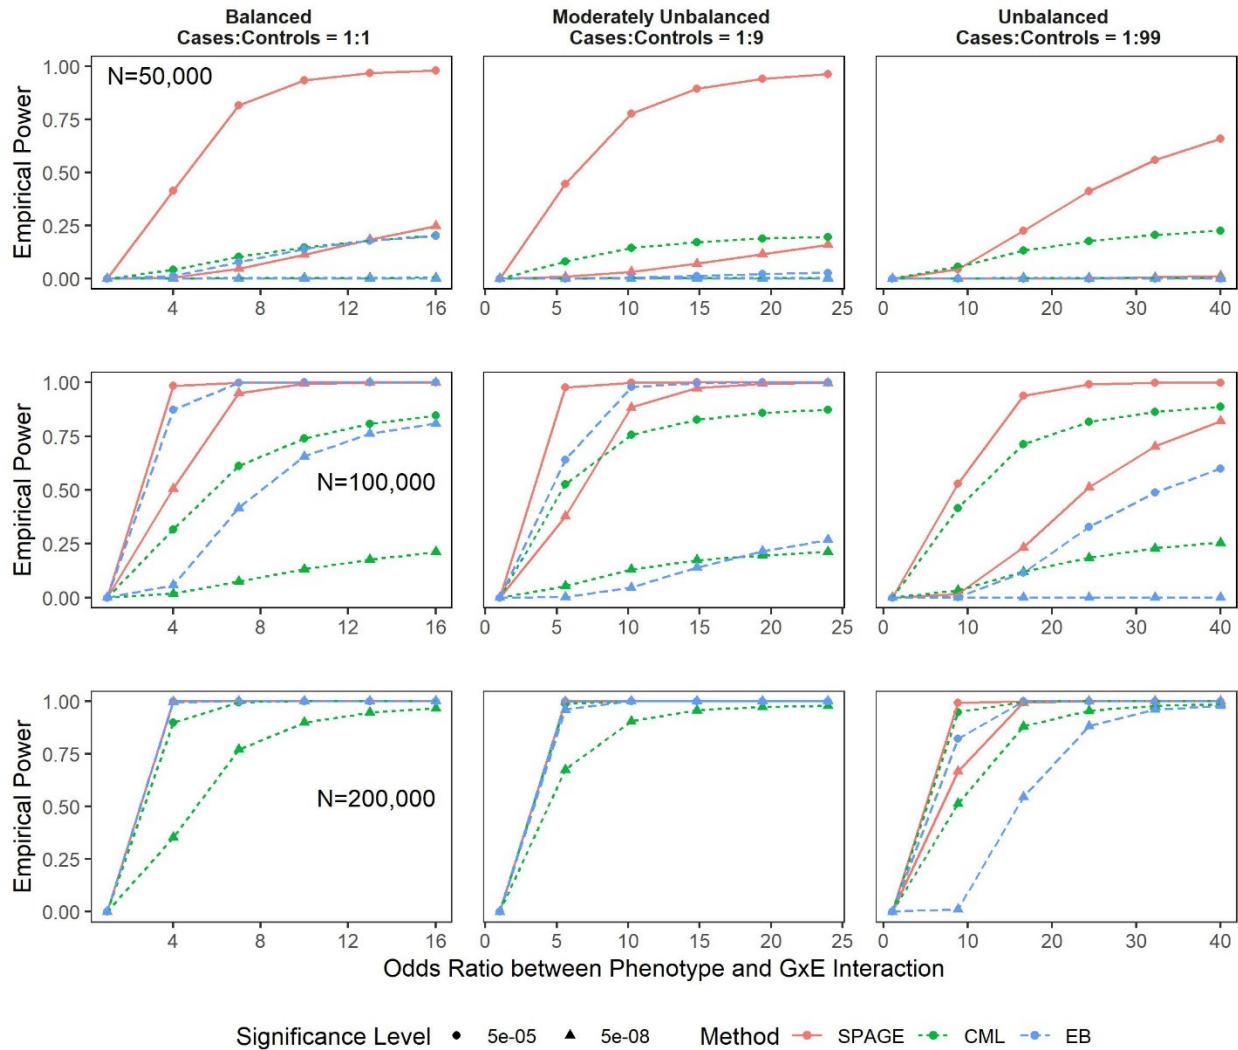

**Figure S4. Empirical powers of SPAGE, CML and EB under different study designs**

Empirical powers were estimated at  $\alpha = 5 \times 10^{-8}$  based on 10,000 simulated datasets. Binary phenotype datasets were first simulated from a cohort design with  $\beta_{G \times E} = \log(1.5)$  and disease prevalence=0.1, and then case-control datasets were constructed by randomly sampling 4000 cases and varying numbers of controls from 4000 to 40,000. CML (constrained maximum likelihood) and EB (empirical Bayes) were calculated via an R package CGEN.

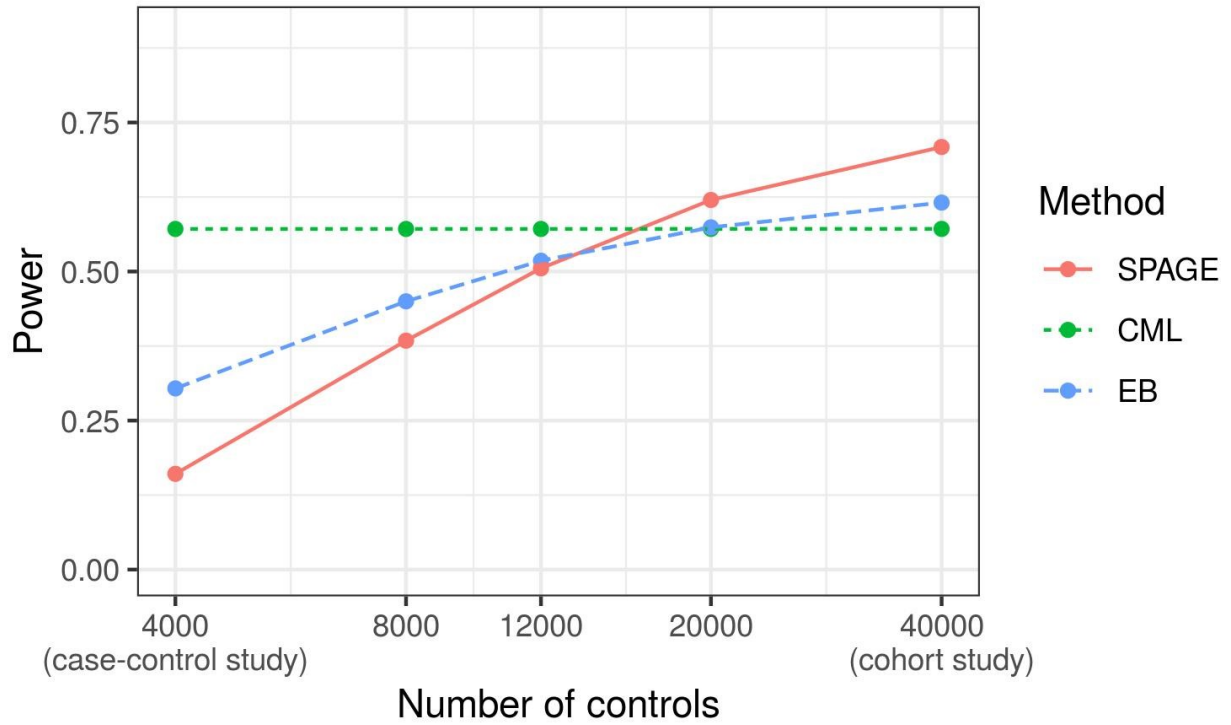

**Figure S5. Failure rate of CO**

Plots shows the empirical failure rates based on  $10^4$  simulated variants with  $\beta_G = 0$  and  $\beta_{G \times E} \neq 0$ . The failure rate is defined as the proportion of “NA” (not a p value) outputted by the CO method in GxEScan (version: 0.5.0). From top to bottom, the plots consider MAFs of 0.01, 0.05, and 0.3. From left to right, the plots consider case-control ratios of 25,000:25,000 (balanced), 5,000:45,000 (moderately unbalanced), and 500:49,500 (unbalanced).

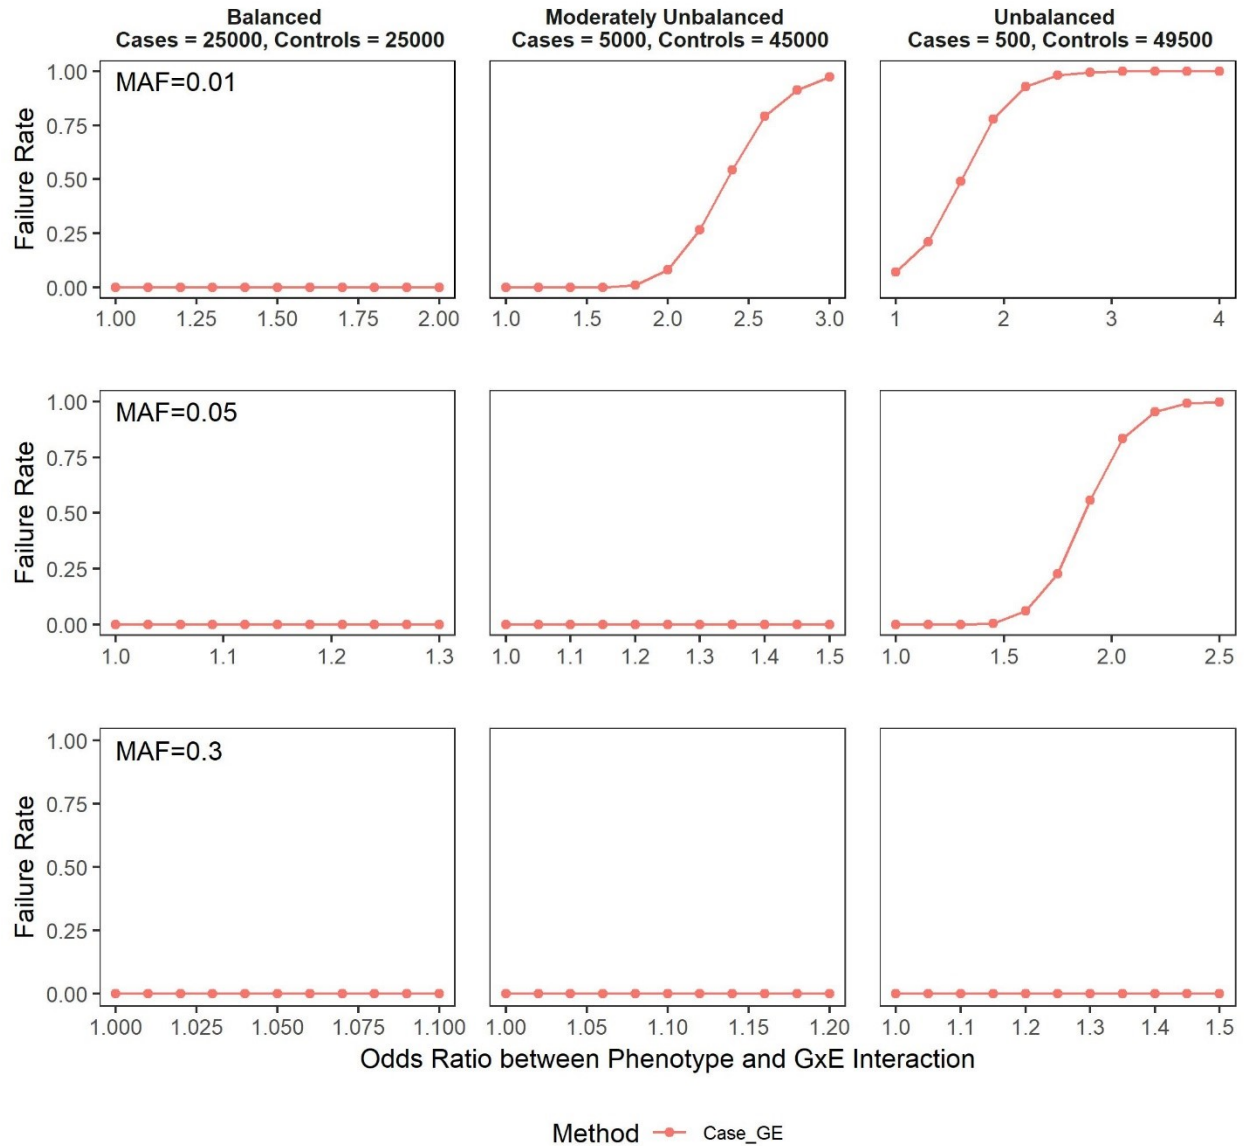

**Figure S6. QQ-plots for three combinations of environmental factors and phenotypes from UK Biobank**

The left panels show QQ-plots based on SPAGE-NoSPA and the right panels show QQ-plots based on SPAGE. The red line represents the genome-wide significance level  $\alpha = 5 \times 10^{-8}$ .

a. *Smoking Status vs Chronic Airway Obstruction (8,701 cases and 314,750 controls)*

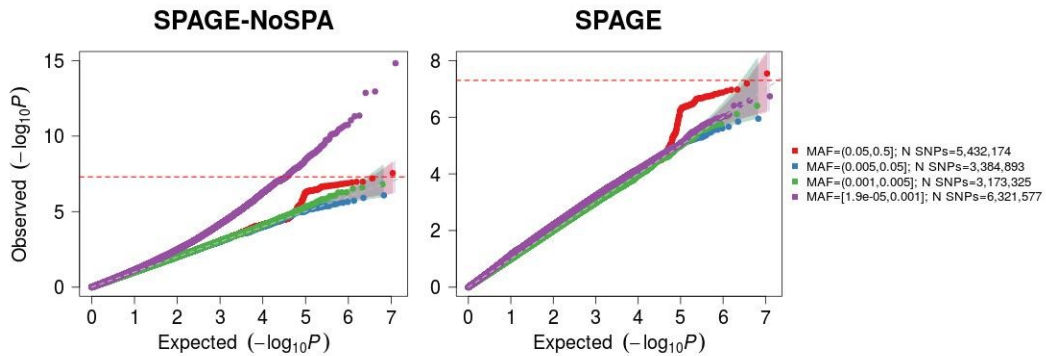

b. *Vigorous Physical Activity vs Hyperlipidemia (27,622 cases and 299,859 controls)*

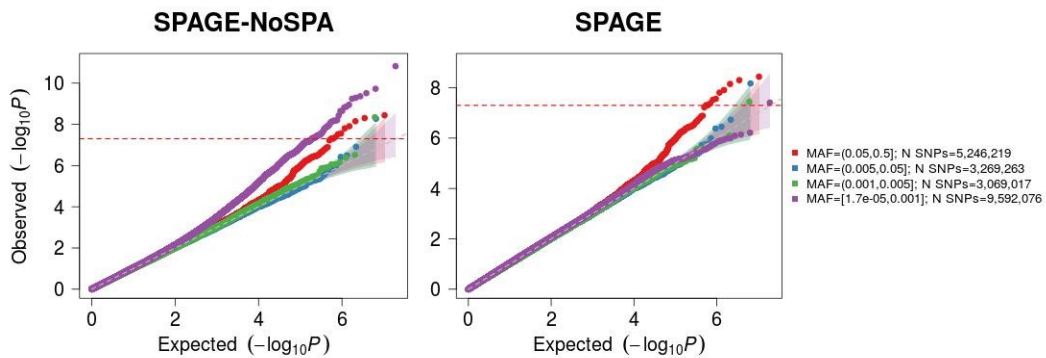

c. *Gender vs Cardiac Dysrhythmias (20,754 cases and 320,152 controls)*

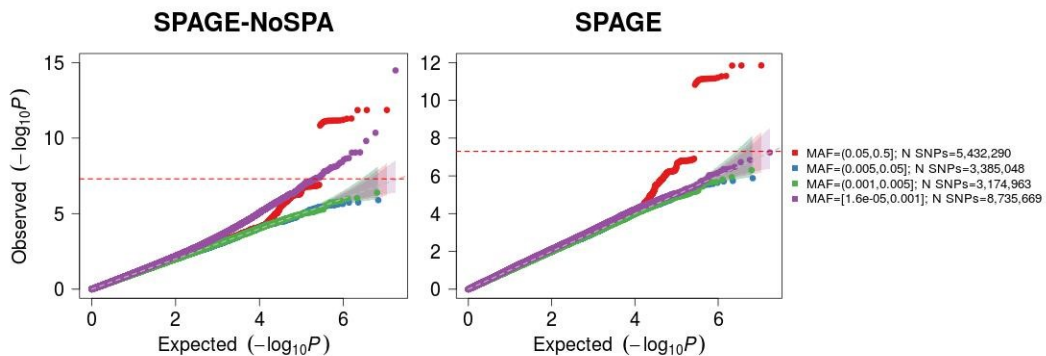



**Figure S7. Associations between phenotypes and environmental factors under different genotypes**

Definitions of the abbreviations of phenotypes and environmental factors can be seen in Figure 6. P values and ORs (with 99% confidence interval) were calculated from the Firth's bias correction. SMK: odds ratio > 1 means smoking increases the disease risk; Sex: odds ratio < 1 means female risk is lower than male risk; VPA: odds ratio < 1 means physical activities can reduce the disease rate. Note that p=0 means the Firth's test  $p < 1 \times 10^{-100}$ .

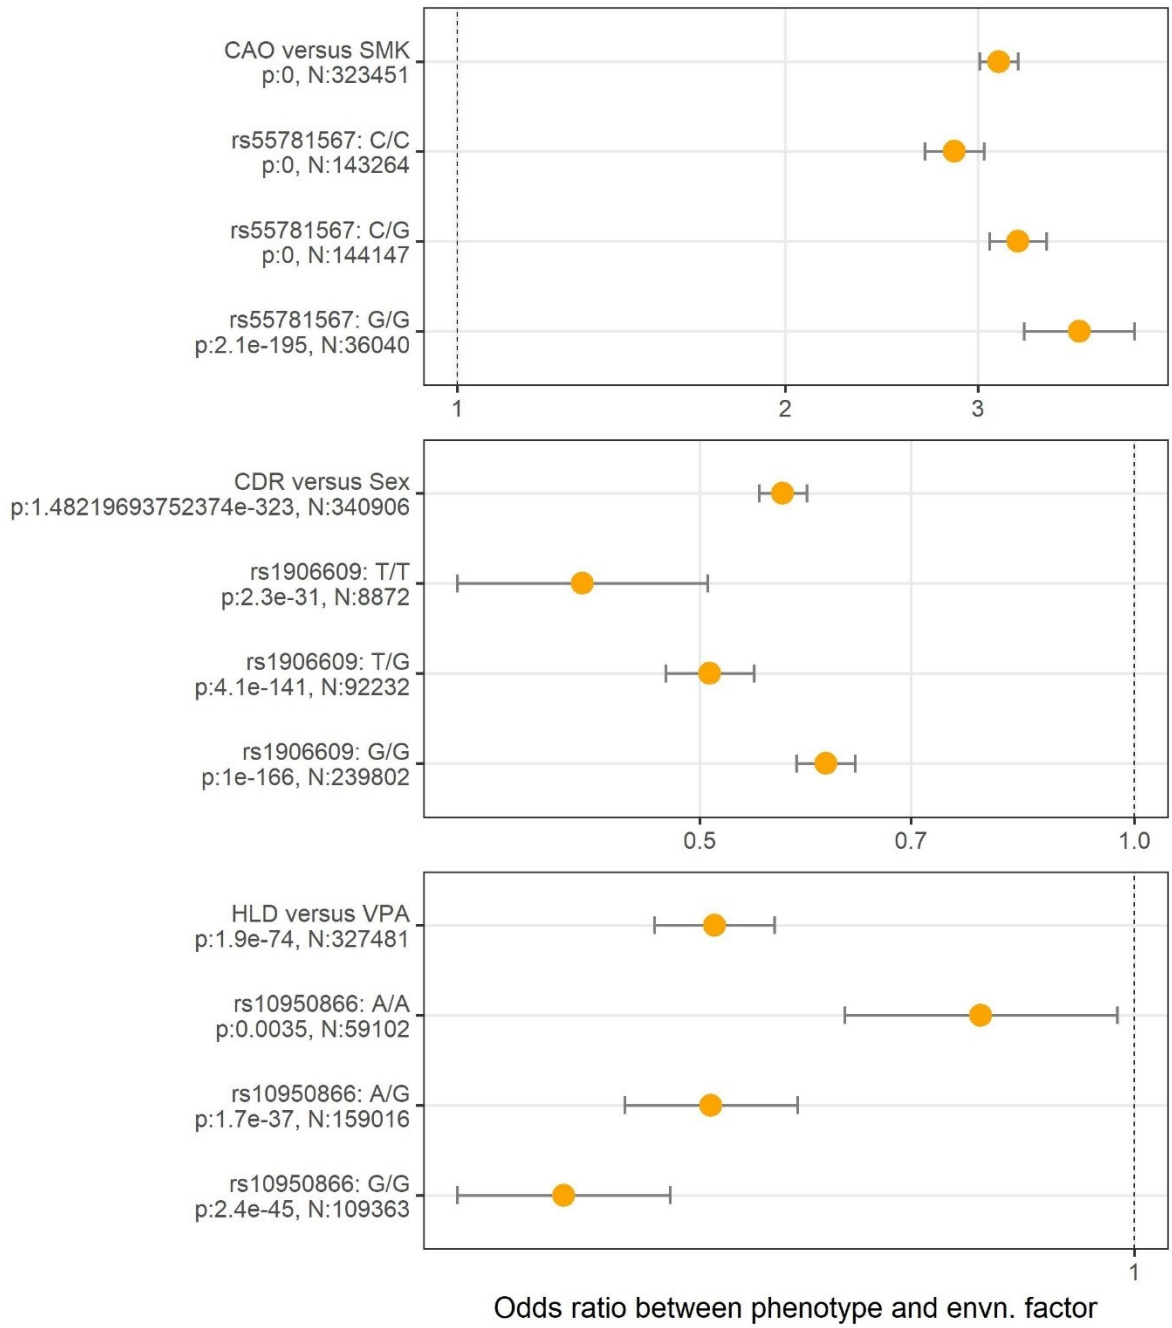

### Figure S8. QQ plots and Manhattan plots of hybrid-version Wald and Firth's test for Alcohol $\times$ Colorectal Cancer

Left panels show analysis results from the hybrid-version of Firth's test and right panels show the analysis results from the hybrid-version of Wald test. Hybrid-version Wald (Firth's test) is to use SPAGE to calculate p values first, and then calculate p values of Wald test (Firth's test) if the SPAGE p values  $< 5 \times 10^{-3}$ . The red line represents the genome-wide significance level  $\alpha = 5 \times 10^{-8}$ .

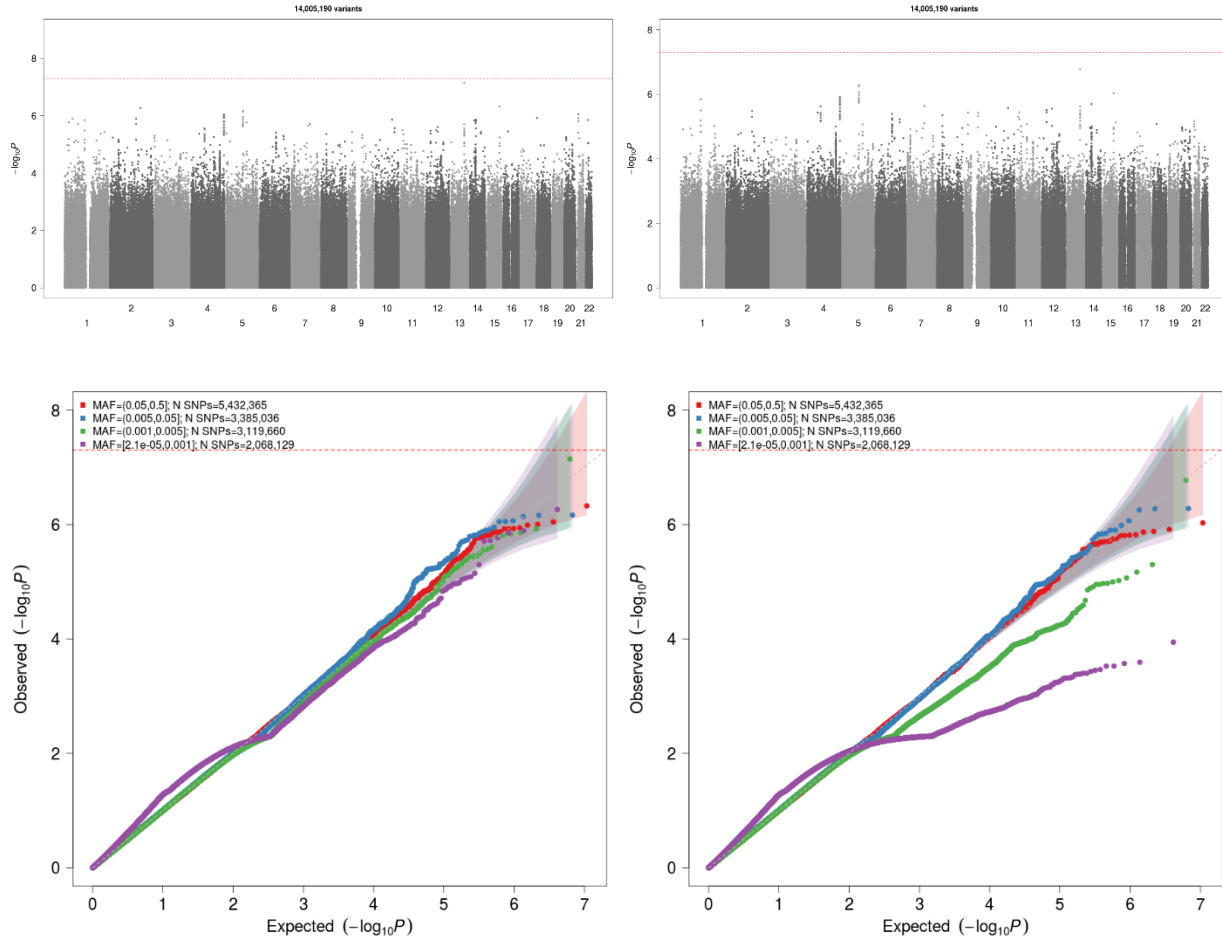

**Table S1(a).** Projected computation time (CPU years) for testing 1,500 phenotypes across 20 million variants by different methods. Total sample size was 400k.

| Number of covariates                                | CPU time (Years) |             |         |              |          |         |
|-----------------------------------------------------|------------------|-------------|---------|--------------|----------|---------|
|                                                     | SPAGE            | SPAGE-NoSPA | Wald    | Firth's test | CML      | CO      |
| Unbalanced: Cases = 4k, Controls = 396k             |                  |             |         |              |          |         |
| 5                                                   | 33.60            | 27.58       | 1808.95 | 4056.78      | 2866.16  | 25.14   |
| 10                                                  | 41.22            | 35.68       | 2360.20 | 7688.51      | 3619.76  | 32.80   |
| 15                                                  | 48.68            | 43.36       | 3010.14 | 12548.06     | 4392.09  | 44.75   |
| 20                                                  | 57.32            | 51.88       | 3830.10 | 18256.50     | 4939.77  | 50.49   |
| 25                                                  | 65.69            | 59.93       | 4794.46 | 24893.76     | 5858.55  | 70.56   |
| 30                                                  | 73.60            | 67.82       | 5790.57 | 32391.50     | 6731.22  | 80.47   |
| Moderately Unbalanced: Cases = 40k, Controls = 360k |                  |             |         |              |          |         |
| 5                                                   | 32.32            | 27.15       | 1249.63 | 3090.29      | 4785.18  | 94.73   |
| 10                                                  | 40.43            | 35.49       | 1581.89 | 5864.45      | 5433.71  | 120.77  |
| 15                                                  | 47.57            | 42.89       | 1982.25 | 9540.05      | 5943.39  | 149.17  |
| 20                                                  | 56.08            | 51.47       | 2529.88 | 13954.00     | 6903.87  | 189.81  |
| 25                                                  | 64.42            | 59.47       | 3117.80 | 18901.81     | 7837.37  | 242.42  |
| 30                                                  | 72.57            | 67.51       | 3762.15 | 24638.23     | 8782.24  | 316.61  |
| Balanced: Cases = 20k, Controls = 20k               |                  |             |         |              |          |         |
| 5                                                   | 31.44            | 26.90       | 1127.26 | 2285.45      | 8219.98  | 193.49  |
| 10                                                  | 39.67            | 35.25       | 1406.31 | 4328.11      | 9321.18  | 335.47  |
| 15                                                  | 47.08            | 42.51       | 1739.04 | 7029.65      | 9809.76  | 464.30  |
| 20                                                  | 55.79            | 51.24       | 2171.09 | 10124.53     | 10761.05 | 627.03  |
| 25                                                  | 63.99            | 59.48       | 2647.43 | 13735.33     | 11597.75 | 996.46  |
| 30                                                  | 72.12            | 67.30       | 3194.51 | 17832.00     | 12908.09 | 1387.74 |

**Table S1(b).** Projected computation time (CPU years) for testing 1,500 phenotypes across 20 million variants by different methods. The number of covariates was 15.

| Total<br>sample size                               | CPU time (Years) |                 |         |              |         |        |
|----------------------------------------------------|------------------|-----------------|---------|--------------|---------|--------|
|                                                    | SPAGE            | SPAGE-<br>NoSPA | Wald    | Firth's test | CML     | CO     |
| Unbalanced: Cases = 1%, Controls = 99%             |                  |                 |         |              |         |        |
| 10k                                                | 1.27             | 0.99            | 82.83   | 266.05       | 167.83  | 1.24   |
| 20k                                                | 2.26             | 1.95            | 158.23  | 465.31       | 321.61  | 2.37   |
| 40k                                                | 4.43             | 3.81            | 301.81  | 947.23       | 689.46  | 4.52   |
| 100k                                               | 10.90            | 9.56            | 735.91  | 2741.12      | 1155.24 | 11.03  |
| 200k                                               | 22.90            | 20.06           | 1486.52 | 6153.09      | 1954.26 | 22.28  |
| 400k                                               | 48.68            | 43.36           | 3010.14 | 13031.65     | 4517.15 | 40.91  |
| Moderately Unbalanced: Cases = 10%, Controls = 90% |                  |                 |         |              |         |        |
| 10k                                                | 1.18             | 0.98            | 51.69   | 177.00       | 212.65  | 5.60   |
| 20k                                                | 2.07             | 1.81            | 94.71   | 344.18       | 420.91  | 10.87  |
| 40k                                                | 4.22             | 3.68            | 177.61  | 720.76       | 1039.32 | 17.87  |
| 100k                                               | 10.41            | 9.27            | 450.17  | 2062.28      | 1833.37 | 46.50  |
| 200k                                               | 21.97            | 19.65           | 950.03  | 4636.29      | 3767.90 | 95.08  |
| 400k                                               | 47.57            | 42.89           | 1982.25 | 9884.51      | 5227.76 | 166.34 |
| Balanced: Cases = 50%, Controls = 50%              |                  |                 |         |              |         |        |
| 10k                                                | 1.14             | 0.94            | 37.07   | 138.38       | 267.59  | 17.08  |
| 20k                                                | 2.06             | 1.82            | 74.17   | 263.44       | 709.83  | 32.28  |
| 40k                                                | 4.11             | 3.65            | 149.81  | 530.44       | 1221.45 | 57.00  |
| 100k                                               | 10.25            | 9.19            | 394.43  | 1535.77      | 3310.66 | 141.78 |
| 200k                                               | 21.94            | 19.99           | 834.71  | 3428.65      | 5996.31 | 273.11 |
| 400k                                               | 47.08            | 42.51           | 1739.04 | 7242.01      | 8477.31 | 536.19 |

**Table S2.** Empirical type I error rates based on  $10^9$  simulated variants, of which 99.9% had no marginal genetic effect and 0.1% had marginal genetic effects with odds ratio of 1.4.

| Significance Levels                                     | MAF   | Empirical type I error rates |             |          |              |
|---------------------------------------------------------|-------|------------------------------|-------------|----------|--------------|
|                                                         |       | SPAGE                        | SPAGE-NoSPA | Wald     | Firth's test |
| Unbalanced: Cases = 500, Controls = 49,500              |       |                              |             |          |              |
| 0.05                                                    | 0.001 | 0.052                        | 0.07        | 0.051    | 0.052        |
|                                                         | 0.01  | 0.052                        | 0.052       | 0.052    | 0.052        |
|                                                         | 0.05  | 0.05                         | 0.05        | 0.05     | 0.05         |
|                                                         | 0.3   | 0.05                         | 0.05        | 0.05     | 0.05         |
| 5E-5                                                    | 0.001 | 2.90E-05                     | 0.002       | 2.00E-09 | 4.70E-06     |
|                                                         | 0.01  | 4.50E-05                     | 0.00019     | 2.00E-05 | 4.50E-05     |
|                                                         | 0.05  | 4.70E-05                     | 7.40E-05    | 5.00E-05 | 5.00E-05     |
|                                                         | 0.3   | 4.70E-05                     | 5.30E-05    | 5.70E-05 | 5.00E-05     |
| 5E-8                                                    | 0.001 | 1.00E-09                     | 0.00015     | 0        | 1.00E-09     |
|                                                         | 0.01  | 4.80E-08                     | 1.80E-06    | 8.00E-09 | 4.00E-08     |
|                                                         | 0.05  | 3.70E-08                     | 1.70E-07    | 4.30E-08 | 4.40E-08     |
|                                                         | 0.3   | 4.20E-08                     | 6.20E-08    | 8.00E-08 | 5.20E-08     |
| Moderately Unbalanced: Cases = 5,000, Controls = 45,000 |       |                              |             |          |              |
| 0.05                                                    | 0.001 | 0.051                        | 0.051       | 0.051    | 0.051        |
|                                                         | 0.01  | 0.05                         | 0.05        | 0.05     | 0.05         |
|                                                         | 0.05  | 0.05                         | 0.05        | 0.05     | 0.05         |
|                                                         | 0.3   | 0.05                         | 0.05        | 0.05     | 0.05         |
| 5E-5                                                    | 0.001 | 4.80E-05                     | 0.00013     | 3.70E-06 | 3.90E-05     |
|                                                         | 0.01  | 5.00E-05                     | 5.70E-05    | 4.00E-05 | 4.90E-05     |
|                                                         | 0.05  | 5.00E-05                     | 5.10E-05    | 4.80E-05 | 5.00E-05     |
|                                                         | 0.3   | 5.00E-05                     | 5.00E-05    | 5.00E-05 | 5.00E-05     |
| 5E-8                                                    | 0.001 | 2.60E-08                     | 1.10E-06    | 0        | 3.10E-08     |
|                                                         | 0.01  | 5.10E-08                     | 1.00E-07    | 3.80E-08 | 5.10E-08     |
|                                                         | 0.05  | 4.90E-08                     | 5.20E-08    | 4.10E-08 | 4.40E-08     |
|                                                         | 0.3   | 4.10E-08                     | 4.30E-08    | 4.30E-08 | 4.20E-08     |
| Balanced: Cases = 25,000, Controls = 25,000             |       |                              |             |          |              |
| 0.05                                                    | 0.001 | 0.049                        | 0.049       | 0.049    | 0.049        |
|                                                         | 0.01  | 0.05                         | 0.05        | 0.05     | 0.05         |
|                                                         | 0.05  | 0.05                         | 0.05        | 0.05     | 0.05         |
|                                                         | 0.3   | 0.05                         | 0.05        | 0.05     | 0.05         |
| 5E-5                                                    | 0.001 | 5.00E-05                     | 5.60E-05    | 1.60E-05 | 4.50E-05     |
|                                                         | 0.01  | 5.00E-05                     | 5.10E-05    | 4.50E-05 | 5.00E-05     |
|                                                         | 0.05  | 5.00E-05                     | 5.00E-05    | 4.90E-05 | 5.00E-05     |
|                                                         | 0.3   | 5.00E-05                     | 5.00E-05    | 5.00E-05 | 5.00E-05     |
| 5E-8                                                    | 0.001 | 4.20E-08                     | 9.80E-08    | 1.00E-09 | 4.20E-08     |
|                                                         | 0.01  | 5.10E-08                     | 6.20E-08    | 4.20E-08 | 5.00E-08     |

|      |          |          |          |          |
|------|----------|----------|----------|----------|
| 0.05 | 4.90E-08 | 5.50E-08 | 4.80E-08 | 5.90E-08 |
| 0.3  | 5.70E-08 | 5.70E-08 | 5.70E-08 | 5.60E-08 |

---

**Table S3.** Complete list of 79 UK-Biobank G×E analyses

| Environmental factor       | PheCode                   | Phenotype name             |
|----------------------------|---------------------------|----------------------------|
| Smoking Status             | 153.2                     | Colon cancer               |
|                            | 165.1                     | Cancer of bronchus; lung   |
|                            | 250.2                     | Type 2 diabetes            |
|                            | 415                       | Pulmonary heart disease    |
|                            | 480                       | Pneumonia                  |
|                            | 495                       | Asthma                     |
|                            | 496                       | Chronic airway obstruction |
|                            | 496.2                     | Chronic bronchitis         |
|                            | 512.7                     | Shortness of breath        |
|                            | 740.1                     | Osteoarthritis; localized  |
| Vigorous Physical Activity | 153                       | Colorectal cancer          |
|                            | 153.2                     | Colon cancer               |
|                            | 174.1                     | Breast cancer [female]     |
|                            | 272.1                     | Hyperlipidemia             |
|                            | 278.1                     | Obesity                    |
|                            | 401                       | Hypertension               |
|                            | 411.4                     | Coronary atherosclerosis   |
|                            | 495                       | Asthma                     |
| 740.1                      | Osteoarthritis; localized |                            |
| Moderate Physical Activity | 153                       | Colorectal cancer          |
|                            | 153.2                     | Colon cancer               |
|                            | 174.1                     | Breast cancer [female]     |
|                            | 272.1                     | Hyperlipidemia             |
|                            | 278.1                     | Obesity                    |
|                            | 411.4                     | Coronary atherosclerosis   |
|                            | 495                       | Asthma                     |
|                            | 740.1                     | Osteoarthritis; localized  |
| Gender                     | 153                       | Colorectal cancer          |
|                            | 153.2                     | Colon cancer               |
|                            | 174                       | Breast cancer              |
|                            | 208                       | Benign neoplasm of colon   |
|                            | 250.1                     | Type 1 diabetes            |
|                            | 250.2                     | Type 2 diabetes            |
|                            | 272.1                     | Hyperlipidemia             |
|                            | 278.1                     | Obesity                    |
|                            | 366                       | Cataract                   |
|                            | 401                       | Hypertension               |
|                            | 411.4                     | Coronary atherosclerosis   |
|                            | 427                       | Cardiac dysrhythmias       |

|                |        |                                                                  |
|----------------|--------|------------------------------------------------------------------|
|                | 455    | Hemorrhoids                                                      |
|                | 495    | Asthma                                                           |
|                | 530.1  | Esophagitis, GERD and related diseases                           |
|                | 550.2  | Diaphragmatic hernia                                             |
|                | 562.1  | Diverticulosis                                                   |
|                | 740.1  | Osteoarthritis; localized                                        |
| Alcohol Intake | 151    | Cancer of stomach                                                |
| Frequency      | 153    | Colorectal cancer                                                |
|                | 153.2  | Colon cancer                                                     |
|                | 155    | Cancer of liver and intrahepatic bile duct                       |
|                | 174.1  | Breast cancer [female]                                           |
|                | 180    | Cervical cancer and dysplasia                                    |
|                | 185    | Cancer of prostate                                               |
|                | 189    | Cancer of urinary organs (incl. kidney and bladder)              |
|                | 198.4  | Secondary malignant neoplasm of liver                            |
|                | 242.1  | Graves' disease                                                  |
|                | 250.2  | Type 2 diabetes                                                  |
|                | 272.1  | Hyperlipidemia                                                   |
|                | 296.2  | Depression                                                       |
|                | 317.11 | Alcoholic liver damage                                           |
|                | 335    | Multiple sclerosis                                               |
|                | 345    | Epilepsy, recurrent seizures, convulsions                        |
|                | 357    | Inflammatory and toxic neuropathy                                |
|                | 401.1  | Essential hypertension                                           |
|                | 411.4  | Coronary atherosclerosis                                         |
|                | 535    | Gastritis and duodenitis                                         |
|                | 555    | Inflammatory bowel disease and other gastroenteritis and colitis |
|                | 571    | Chronic liver disease and cirrhosis                              |
|                | 571.8  | Liver abscess and sequelae of chronic liver disease              |
|                | 573.7  | Abnormal results of function study of liver                      |
|                | 580    | Nephritis; nephrosis; renal sclerosis                            |
|                | 601    | Inflammatory diseases of prostate                                |
|                | 613.1  | Inflammatory disease of breast                                   |
|                | 614    | Inflammatory diseases of female pelvic organs                    |
|                | 614.5  | Inflammatory disease of cervix, vagina, and vulva                |
|                | 696.4  | Psoriasis                                                        |
|                | 714    | Rheumatoid arthritis and other inflammatory polyarthropathies    |
|                | 714.1  | Rheumatoid arthritis                                             |
|                | 740    | Osteoarthrosis                                                   |
|                | 740.1  | Osteoarthritis; localized                                        |

---



**Table S4.** Complete list of SNPs identified with GxE p-values less than  $5 \times 10^{-8}$  for all 79 combinations. Only the most significant SNP is displayed for each gene.

| Environ. factor            | Phenotype                  | RSID             | POS                | Imputation Info Score | MAF         | P value (G effect) | P value (SPAGE) | P value (Wald) | P value (Firth) | Func.refGene   | Gene.refGene                                |
|----------------------------|----------------------------|------------------|--------------------|-----------------------|-------------|--------------------|-----------------|----------------|-----------------|----------------|---------------------------------------------|
| Smoking Status             | Pulmonary heart disease    | rs7110737        | chr11:35221862_T/A | 0.97                  | 0.411128    | 0.398979           | 3.57E-08        | 3.57E-08       | 3.80E-08        | intronic       | <i>CD44</i>                                 |
|                            | Pneumonia                  | rs143536717      | chr3:191177346_A/G | 0.97                  | 0.007473    | 0.01789            | 4.93E-08        | 5.54E-07       | 4.57E-07        | ncRNA_intronic | <i>LINC0002</i>                             |
|                            | Chronic airway obstruction | rs55781567       | chr15:78857986_C/G | 1.00                  | 0.33425     | 7.76E-12           | 2.87E-08        | 2.64E-08       | 2.55E-08        | UTR5           | <i>CHRNA5</i>                               |
|                            | Osteoarthritis; localized  | rs78340654       | chr7:1532370_G/A   | 0.89                  | 0.000163451 | 0.010843181        | 4.50E-08        | 1.57E-04       | 1.76E-06        |                |                                             |
| Vigorous Physical Activity | Colon cancer               | rs79671386       | chr5:99062643_T/C  | 0.99                  | 0.05274     | 0.459981           | 3.36E-08        | 2.69E-08       | 7.11E-08        | intergenic     | <i>LINC02113;</i><br><i>LOC100133050</i>    |
|                            | Breast cancer [female]     | rs184243882      | chr4:20512383_A/G  | 0.66                  | 0.00072     | 0.201173           | 1.80E-08        | 1.35E-06       | 6.17E-08        | intronic       | <i>SLIT2</i>                                |
|                            | Hyperlipidemia             | rs10950866       | chr7:21691020_A/G  | 0.99                  | 0.422983    | 0.256812           | 3.64E-09        | 3.75E-09       | 3.82E-09        | intronic       | <i>DNAH11</i>                               |
|                            |                            | rs72766601       | chr16:4487228_T/C  | 0.94                  | 0.02624     | 0.237775           | 6.76E-09        | 4.01E-09       | 1.47E-09        | intronic       | <i>DNAJA3</i>                               |
|                            |                            | rs148392361      | chr5:134774969_G/C | 0.77                  | 0.001389    | 0.695679           | 3.58E-08        | 4.04E-08       | 5.83E-08        | intergenic     | <i>H2AFY;</i><br><i>DCANP1</i>              |
|                            |                            | rs751416555      | chr12:5324708_A/T  | 0.68                  | 0.000211    | 0.15628            | 3.89E-08        | 1.93E-06       | 1.90E-07        | intergenic     | <i>KCNA5;</i><br><i>LINC02443</i>           |
|                            | Obesity                    | rs573332928      | chr6:134079709_G/A | 0.74                  | 0.000271    | 0.025765           | 1.35E-08        | 6.74E-05       | 1.36E-07        | ncRNA_intronic | <i>TARID</i>                                |
|                            | Hypertension               | rs544654680      | chr7:126380856_C/T | 0.55                  | 8.94E-05    | 0.163684           | 4.11E-08        | 2.99E-04       | 2.69E-07        | intronic       | <i>GRM8</i>                                 |
|                            | Coronary atherosclerosis   | rs187091750      | chr2:13326086_A/G  | 0.68                  | 0.001044    | 0.027349           | 2.35E-08        | 3.72E-07       | 3.80E-07        | intergenic     | <i>LOC100506474;</i><br><i>LINC00276</i>    |
|                            |                            | rs560526713      | chr19:28773859_C/T | 0.81                  | 0.0014      | 0.101384           | 3.81E-08        | 2.26E-07       | 2.60E-07        | intergenic     | <i>LOC101927151;</i><br><i>LOC100420587</i> |
| Osteoarthritis; localized  | rs777378934                | chr4:7851958_G/A | 0.86               | 0.000189              | 0.00968     | 4.85E-08           | 5.09E-05        | 1.96E-06       | intronic        | <i>AFAP1</i>   |                                             |
| Moderate Physical Activity | Breast cancer [female]     | rs749311254      | chr12:62966647_G/A | 0.47                  | 0.000182    | 0.00183            | 1.80E-08        | 7.10E-04       | 2.79E-06        | intronic       | <i>MON2</i>                                 |
|                            |                            | rs773484956      | chr7:97812510_C/T  | 0.49                  | 0.000117    | 0.007363           | 2.75E-08        | 8.93E-03       | 1.46E-07        | intronic       | <i>LMTK2</i>                                |
|                            |                            | 12:63024809_C T  | chr12:63024809_C/T | 0.52                  | 0.000228    | 0.002734           | 3.49E-08        | 4.57E-04       | 4.38E-06        | intergenic     | <i>MIRLET7I;</i><br><i>PPMIH</i>            |
|                            | Hyperlipidemia             | rs575180110      | chr1:166580616_A/T | 0.93                  | 0.000877    | 0.561031           | 7.61E-09        | 4.74E-08       | 2.34E-10        | ncRNA_intronic | <i>FMO9P</i>                                |
|                            |                            | rs566421195      | chr1:166618041_G/A | 0.91                  | 0.000872    | 0.544749           | 4.39E-08        | 1.40E-07       | 2.10E-09        | intergenic     | <i>FMO9P;</i><br><i>POGK</i>                |
|                            | Coronary atherosclerosis   | 6:4226163_A G    | chr6:4226163_A/G   | 0.69                  | 0.000146    | 0.045534           | 4.95E-08        | 2.84E-04       | 1.95E-07        | intergenic     | <i>LOC102724096;</i><br><i>MIR7641-2</i>    |
| Gender                     | Breast cancer              | rs187684970      | chr16:22882559_C/G | 0.64                  | 0.000426    | 0.019957           | 4.08E-08        | 5.32E-11       | 1.92E-07        | intronic       | <i>HS3ST2</i>                               |

|                                |                                                                              |                        |                        |          |          |          |          |          |            |                                |                                    |
|--------------------------------|------------------------------------------------------------------------------|------------------------|------------------------|----------|----------|----------|----------|----------|------------|--------------------------------|------------------------------------|
|                                | Obesity                                                                      | rs111916547            | chr5:100752821_G/<br>C | 0.93     | 0.024807 | 0.658796 | 2.71E-08 | 2.58E-08 | 1.89E-08   | intergenic                     | <i>ST8SLA4;</i><br><i>SLCO4C1</i>  |
|                                | Hypertension                                                                 | rs536096974            | chr12:68684330_T/<br>G | 0.85     | 0.000273 | 0.407587 | 4.04E-08 | 1.63E-06 | 9.72E-08   | intergenic                     | <i>IL22;MDM1</i>                   |
|                                | Cardiac<br>dysrhythmias                                                      | rs1906609              | chr4:111666451_T/<br>G | 0.99     | 0.161169 | 3.06E-68 | 1.42E-12 | 1.11E-12 | 9.12E-13   | intergenic                     | <i>PITX2;C4orf32</i>               |
|                                | Osteoarthritis;<br>localized                                                 | rs764592273            | chr6:147505792_G/<br>T | 0.55     | 0.000228 | 0.002254 | 1.32E-08 | 3.04E-03 | 2.01E-06   | ncRNA_intronic                 | <i>STXBP5-AS1</i>                  |
| Alcohol<br>Intake<br>Frequency | Colorectal<br>cancer                                                         | rs182738346            | chr13:46910214_G/<br>A | 0.97     | 0.004272 | 0.23162  | 2.20E-08 | 1.67E-07 | 7.15E-08   | intergenic                     | <i>LINC00563;</i><br><i>RUBCNL</i> |
|                                | Cancer of liver<br>and<br>intrahepatic<br>bile duct                          | rs142741673            | chr1:121333234_A/<br>G | 0.66     | 0.038023 | 0.066781 | 3.28E-08 | 1.05E-06 | 2.31E-07   | intergenic                     | <i>EMBPI;</i><br><i>NONE</i>       |
|                                | Hyperlipidemia                                                               | rs11590266             | chr1:4668423_A/G       | 0.98     | 0.448755 | 0.123365 | 1.70E-08 | 1.68E-08 | 1.68E-08   | intergenic                     | <i>LINC01646;</i><br><i>AJAP1</i>  |
|                                | Coronary<br>atherosclerosis                                                  | rs117925601            | chr7:54226938_C/<br>A  | 0.75     | 0.001869 | 0.095424 | 2.18E-09 | 3.12E-08 | 1.75E-08   | intergenic                     | <i>LINC01446;</i><br><i>HPVCI</i>  |
|                                | Gastritis and<br>duodenitis                                                  | rs2980819              | chr8:40030619_A/<br>G  | 0.92     | 0.000196 | 0.027399 | 9.07E-09 | 8.92E-05 | 2.01E-07   | intergenic                     | <i>C8orf4;</i><br><i>ZMAT4</i>     |
|                                | Inflammatory<br>bowel disease<br>and other<br>gastroenteritis<br>and colitis | rs112987403            | chr1:222211061_C/<br>T | 0.98     | 0.032692 | 0.737616 | 1.11E-08 | 1.45E-08 | 1.53E-08   | intergenic                     | <i>LINC01655;</i><br><i>HHIPL2</i> |
|                                |                                                                              | rs531476607            | chr2:151185194_T/<br>G | 0.80     | 0.001605 | 0.004403 | 2.42E-08 | 1.17E-05 | 1.87E-06   | intergenic                     | <i>LINC01817;</i><br><i>RND3</i>   |
|                                | rs188807449                                                                  | chr22:23942723_C/<br>T | 0.76                   | 0.000567 | 0.018596 | 5.00E-08 | 5.81E-04 | 5.28E-07 | intergenic | <i>IGLL1;</i><br><i>DRICH1</i> |                                    |

**Table S5.** Complete list of SNPs identified with GxE p-values less than  $5 \times 10^{-8}$  for the highlighted three combinations.

| Environ. factor | Phenotype                  | RSID       | POS                | Imputation Info Score | MAF      | P-value (G effect) | P-value (SPAGE) | P-value (Firth) | P-value (Wald)                  | Func.refGene | Gene.refGene                    |
|-----------------|----------------------------|------------|--------------------|-----------------------|----------|--------------------|-----------------|-----------------|---------------------------------|--------------|---------------------------------|
| Smoking Status  | Chronic Airway Obstruction | rs55781567 | chr15:78857986_C/G | 1                     | 0.3343   | 7.76E-12           | 2.87E-08        | 2.55E-08        | 2.64E-08                        | UTR5         | <i>CHRNA5</i>                   |
| Gender          | Cardiac Dysrhythmias       | rs1906609  | chr4:111666451_T/G | 0.99                  | 0.1612   | 3.06E-68           | 1.42E-12        | 9.12E-13        | 1.11E-12                        | intergenic   | <i>PITX2;</i><br><i>C4orf32</i> |
|                 |                            | rs2634073  | chr4:111665783_T/C | 0.99                  | 0.1613   | 3.53E-68           | 1.43E-12        | 9.19E-13        | 1.12E-12                        | intergenic   | <i>PITX2;</i><br><i>C4orf32</i> |
|                 |                            | rs2634071  | chr4:111669220_T/C | 0.99                  | 0.1613   | 3.23E-68           | 1.44E-12        | 9.29E-13        | 1.13E-12                        | intergenic   | <i>PITX2;</i><br><i>C4orf32</i> |
|                 |                            | rs1906599  | chr4:111712686_T/C | 0.99                  | 0.1935   | 6.03E-77           | 5.16E-12        | 3.40E-12        | 3.94E-12                        | intergenic   | <i>PITX2;</i><br><i>C4orf32</i> |
|                 |                            | rs2129977  | chr4:111712432_A/G | 0.99                  | 0.1933   | 5.65E-77           | 5.37E-12        | 3.54E-12        | 4.10E-12                        | intergenic   | <i>PITX2;</i><br><i>C4orf32</i> |
|                 |                            | rs2129983  | chr4:111704080_G/A | 0.99                  | 0.1935   | 1.22E-76           | 6.29E-12        | 4.17E-12        | 4.82E-12                        | intergenic   | <i>PITX2;</i><br><i>C4orf32</i> |
|                 |                            | rs6854111  | chr4:111704536_A/T | 0.99                  | 0.1930   | 8.38E-77           | 6.89E-12        | 4.57E-12        | 5.28E-12                        | intergenic   | <i>PITX2;</i><br><i>C4orf32</i> |
|                 |                            | rs2129982  | chr4:111704143_A/G | 0.99                  | 0.1930   | 1.06E-76           | 7.00E-12        | 4.65E-12        | 5.37E-12                        | intergenic   | <i>PITX2;</i><br><i>C4orf32</i> |
|                 |                            | rs7689774  | chr4:111703510_G/T | 0.99                  | 0.1932   | 1.27E-76           | 7.05E-12        | 4.68E-12        | 5.41E-12                        | intergenic   | <i>PITX2;</i><br><i>C4orf32</i> |
|                 |                            | rs13143308 | chr4:111714419_T/G | 1.00                  | 0.1937   | 3.98E-77           | 7.11E-12        | 4.71E-12        | 5.45E-12                        | intergenic   | <i>PITX2;</i><br><i>C4orf32</i> |
|                 |                            | rs67249485 | chr4:111699685_A/T | 0.99                  | 0.1930   | 1.04E-76           | 7.21E-12        | 4.79E-12        | 5.53E-12                        | intergenic   | <i>PITX2;</i><br><i>C4orf32</i> |
|                 |                            | rs6820568  | chr4:111699831_C/T | 0.99                  | 0.1932   | 1.39E-76           | 7.26E-12        | 4.83E-12        | 5.58E-12                        | intergenic   | <i>PITX2;</i><br><i>C4orf32</i> |
| rs6837901       | chr4:111698108_T/C         | 0.99       | 0.1931             | 1.58E-76              | 7.36E-12 | 4.89E-12           | 5.65E-12        | intergenic      | <i>PITX2;</i><br><i>C4orf32</i> |              |                                 |

|                            |                   |             |                    |       |          |          |          |          |               |            |                                   |
|----------------------------|-------------------|-------------|--------------------|-------|----------|----------|----------|----------|---------------|------------|-----------------------------------|
|                            |                   | rs1906616   | chr4:111697568_A/G | 0.99  | 0.1931   | 1.53E-76 | 7.47E-12 | 4.97E-12 | 5.74E-12      | intergenic | <i>PITX2;</i><br><i>C4orf32</i>   |
|                            |                   | rs1906615   | chr4:111701798_G/T | 0.99  | 0.1930   | 1.10E-76 | 7.83E-12 | 5.21E-12 | 6.02E-12      | intergenic | <i>PITX2;</i><br><i>C4orf32</i>   |
|                            |                   | rs6843082   | chr4:111718067_G/A | 1.00  | 0.1932   | 2.07E-78 | 8.19E-12 | 5.43E-12 | 6.26E-12      | intergenic | <i>PITX2;</i><br><i>C4orf32</i>   |
|                            |                   | rs6847935   | chr4:111696651_A/T | 0.99  | 0.1930   | 1.81E-76 | 8.87E-12 | 5.92E-12 | 6.83E-12      | intergenic | <i>PITX2;</i><br><i>C4orf32</i>   |
|                            |                   | rs2634074   | chr4:111677041_T/A | 0.99  | 0.1930   | 2.50E-76 | 1.10E-11 | 7.41E-12 | 8.52E-12      | intergenic | <i>PITX2;</i><br><i>C4orf32</i>   |
|                            |                   | rs2466455   | chr4:111685615_C/T | 0.99  | 0.1930   | 1.51E-76 | 1.16E-11 | 7.81E-12 | 8.98E-12      | intergenic | <i>PITX2;</i><br><i>C4orf32</i>   |
|                            |                   | rs2723334   | chr4:111688752_T/C | 0.99  | 0.1932   | 2.97E-76 | 1.49E-11 | 1.01E-11 | 1.15E-11      | intergenic | <i>PITX2;</i><br><i>C4orf32</i>   |
| Vigorous Physical Activity | Hyperlipidemia    | rs10950866  | chr7:21691020_A/G  | 0.99  | 0.4230   | 0.257    | 3.64E-09 | 3.82E-09 | 3.75E-09      | intronic   | <i>DNAH11</i>                     |
|                            |                   | rs2030672   | chr7:21687925_G/C  | 0.99  | 0.4403   | 0.142    | 4.99E-09 | 5.19E-09 | 5.14E-09      | intronic   | <i>DNAH11</i>                     |
|                            |                   | rs72766601  | chr16:4487228_T/C  | 0.94  | 0.0262   | 0.238    | 6.76E-09 | 1.47E-09 | 4.01E-09      | intronic   | <i>DNAJA3</i>                     |
|                            |                   | rs10260140  | chr7:21690063_A/T  | 0.99  | 0.4200   | 0.221    | 7.08E-09 | 7.45E-09 | 7.31E-09      | intronic   | <i>DNAH11</i>                     |
|                            |                   | rs11762779  | chr7:21713592_C/T  | 0.98  | 0.4499   | 0.344    | 1.23E-08 | 1.27E-08 | 1.26E-08      | intronic   | <i>DNAH11</i>                     |
|                            |                   | rs6975512   | chr7:21706255_G/A  | 1.00  | 0.4337   | 0.392    | 1.56E-08 | 1.61E-08 | 1.59E-08      | intronic   | <i>DNAH11</i>                     |
|                            |                   | rs7793951   | chr7:21700039_C/G  | 1.00  | 0.4279   | 0.542    | 2.74E-08 | 2.83E-08 | 2.79E-08      | intronic   | <i>DNAH11</i>                     |
|                            |                   | rs2390549   | chr7:21697779_A/T  | 0.99  | 0.4312   | 0.560    | 3.01E-08 | 3.11E-08 | 3.06E-08      | intronic   | <i>DNAH11</i>                     |
|                            |                   | rs148392361 | chr5:134774969_G/C | 0.77  | 0.0014   | 0.696    | 3.58E-08 | 5.83E-08 | 4.04E-08      | intergenic | <i>H2AFY;</i><br><i>DCANP1</i>    |
|                            |                   | rs751416555 | chr12:5324708_A/T  | 0.68  | 0.0002   | 0.156    | 3.89E-08 | 1.90E-07 | 1.93E-06      | intergenic | <i>KCNA5;</i><br><i>LINC02443</i> |
|                            |                   | rs714423    | chr7:21712615_C/A  | 0.99  | 0.3945   | 0.835    | 4.13E-08 | 4.29E-08 | 4.17E-08      | intronic   | <i>DNAH11</i>                     |
|                            |                   | rs970020    | chr7:21711019_G/A  | 1.00  | 0.4352   | 0.340    | 4.92E-08 | 5.07E-08 | 5.01E-08      | intronic   | <i>DNAH11</i>                     |
| rs10950869                 | chr7:21711860_C/T | 0.99        | 0.3915             | 0.811 | 4.92E-08 | 5.12E-08 | 4.97E-08 | intronic | <i>DNAH11</i> |            |                                   |
